# Supplementary material
Source: HighWire-hosted journal article supplement (https://bmjopen.bmj.com/content/12/5/e059371)
Supplement: inline-supplementary-material-2 [file inline-supplementary-material-2.pdf]

Supplementary File 2. Baseline characteristics (full list). Created by the authors

|                                       | People 65+ years living in households up to 6 people <sup>a</sup> |              |                  | People 65+ years living in households of 2 people <sup>a</sup> |                                  |                                 |
|---------------------------------------|-------------------------------------------------------------------|--------------|------------------|----------------------------------------------------------------|----------------------------------|---------------------------------|
|                                       | All                                                               | Living Alone | Not living alone | All                                                            | Living with someone with frailty | Cohabitee not recorded as frail |
| Total study population (65 years+)    | 4,876,285                                                         | 1,464,379    | 3,411,906        | 2,459,937                                                      | 255,312                          | 2,204,625                       |
| Male                                  | 47.04%                                                            | 34.02%       | 52.63%           | 52.44%                                                         | 53.84%                           | 52.28%                          |
| Age, median [IQR]                     | 75 [70, 81]                                                       | 79 [72, 85]  | 74 [69, 79]      | 74 [70, 80]                                                    | 77 [71, 83]                      | 74 [70, 80]                     |
| Number living in household, mean (SD) | 2.02 (0.99)                                                       |              |                  |                                                                |                                  |                                 |
| Ethnicity                             |                                                                   |              |                  |                                                                |                                  |                                 |
| White                                 | 80.96%                                                            | 83.06%       | 80.06%           | 82.85%                                                         | 84.64%                           | 82.64%                          |
| Mixed                                 | 0.23%                                                             | 0.23%        | 0.23%            | 0.17%                                                          | 0.16%                            | 0.17%                           |
| Asian                                 | 2.55%                                                             | 1.12%        | 3.16%            | 1.53%                                                          | 1.38%                            | 1.55%                           |
| Black                                 | 1.11%                                                             | 1.11%        | 1.11%            | 0.66%                                                          | 0.54%                            | 0.67%                           |
| Other                                 | 0.62%                                                             | 0.51%        | 0.67%            | 0.46%                                                          | 0.40%                            | 0.46%                           |
| Not stated/missing                    | 14.52%                                                            | 13.96%       | 14.76%           | 14.33%                                                         | 12.88%                           | 14.50%                          |
| Deprivation                           |                                                                   |              |                  |                                                                |                                  |                                 |
| Quintile #5 (least deprived quintile) | 23.37%                                                            | 19.71%       | 24.94%           | 26.19%                                                         | 24.52%                           | 26.38%                          |
| Quintile #4                           | 22.87%                                                            | 20.89%       | 23.72%           | 24.45%                                                         | 23.27%                           | 24.59%                          |
| Quintile #3                           | 21.29%                                                            | 20.97%       | 21.43%           | 21.51%                                                         | 21.22%                           | 21.54%                          |
| Quintile #2                           | 17.68%                                                            | 19.63%       | 16.84%           | 16.08%                                                         | 17.03%                           | 15.96%                          |
| Quintile #1 (most deprived quintile)  | 14.80%                                                            | 18.80%       | 13.08%           | 11.77%                                                         | 13.95%                           | 11.52%                          |
| Rural location                        | 22.27%                                                            | 19.08%       | 23.64%           | 25.04%                                                         | 22.56%                           | 25.32%                          |
| Region                                |                                                                   |              |                  |                                                                |                                  |                                 |
| East Midlands                         | 8.94%                                                             | 8.70%        | 9.04%            | 9.57%                                                          | 9.18%                            | 9.62%                           |

|                                                        |                |                |                |                |                |             |
|--------------------------------------------------------|----------------|----------------|----------------|----------------|----------------|-------------|
| East of England                                        | 11.69%         | 11.34%         | 11.84%         | 12.23%         | 11.61%         | 12.30%      |
| London                                                 | 10.07%         | 10.04%         | 10.09%         | 7.51%          | 7.93%          | 7.46%       |
| North East                                             | 5.51%          | 6.02%          | 5.28%          | 5.61%          | 6.03%          | 5.57%       |
| North West                                             | 14.10%         | 14.65%         | 13.86%         | 13.85%         | 15.13%         | 13.70%      |
| South East                                             | 17.00%         | 16.57%         | 17.19%         | 17.36%         | 17.04%         | 17.40%      |
| South West                                             | 11.89%         | 11.58%         | 12.02%         | 12.66%         | 12.11%         | 12.72%      |
| West Midlands                                          | 10.62%         | 10.45%         | 10.69%         | 10.61%         | 10.64%         | 10.61%      |
| Yorkshire and The Humber                               | 10.19%         | 10.65%         | 9.99%          | 10.59%         | 10.33%         | 10.62%      |
| Diagnosis history (previous three years)               |                |                |                |                |                |             |
| No. frailty syndromes, mean (SD) <sup>b</sup>          | 0.36<br>(0.76) | 0.51<br>(0.90) | 0.30<br>(0.68) | 0.29<br>(0.67) | 0.40<br>(0.80) | 0.28 (0.65) |
| No. Elixhauser conditions, mean (SD) <sup>b</sup>      | 2.07<br>(1.90) | 2.30<br>(1.99) | 1.97<br>(1.85) | 1.95<br>(1.83) | 2.22<br>(1.96) | 1.92 (1.81) |
| Frailty (1+ frailty related syndrome) <sup>b</sup>     | 24.69%         | 32.72%         | 21.24%         | 21.05%         | 26.90%         | 20.37%      |
| Multimorbidity (2+ Elixhauser conditions) <sup>b</sup> | 53.83%         | 58.93%         | 51.64%         | 51.15%         | 57.09%         | 50.46%      |
| History of mental ill health                           | 21.19%         | 26.18%         | 19.05%         | 18.30%         | 22.27%         | 17.84%      |
| History of serious mental ill health                   | 0.72%          | 1.18%          | 0.52%          | 0.48%          | 0.60%          | 0.47%       |
| Elixhauser conditions (previous three years)           |                |                |                |                |                |             |
| Alcohol abuse                                          | 2.70%          | 3.29%          | 2.45%          | 2.36%          | 2.69%          | 2.32%       |
| Blood loss anaemia                                     | 0.12%          | 0.15%          | 0.10%          | 0.10%          | 0.12%          | 0.10%       |
| Deficiency anaemia                                     | 5.50%          | 6.65%          | 5.01%          | 4.84%          | 5.95%          | 4.71%       |
| Cardiac arrhythmias                                    | 18.93%         | 21.61%         | 17.77%         | 18.14%         | 21.53%         | 17.75%      |
| Coagulopathy                                           | 0.90%          | 0.92%          | 0.90%          | 0.89%          | 0.95%          | 0.88%       |
| Depression                                             | 5.89%          | 7.71%          | 5.11%          | 4.97%          | 6.46%          | 4.80%       |
| Diabetes, complicated                                  | 2.12%          | 2.20%          | 2.09%          | 1.90%          | 2.24%          | 1.86%       |
| Diabetes, uncomplicated                                | 15.85%         | 16.04%         | 15.76%         | 14.84%         | 16.76%         | 14.62%      |

|                                                   |        |        |        |        |        |        |
|---------------------------------------------------|--------|--------|--------|--------|--------|--------|
| Drug abuse                                        | 0.11%  | 0.18%  | 0.09%  | 0.07%  | 0.10%  | 0.07%  |
| Fluid/electrolyte disorders                       | 7.44%  | 9.82%  | 6.42%  | 6.22%  | 7.96%  | 6.01%  |
| Hypertension, complicated                         | 0.25%  | 0.26%  | 0.24%  | 0.23%  | 0.25%  | 0.22%  |
| Hypertension, uncomplicated                       | 52.18% | 55.71% | 50.66% | 50.42% | 54.70% | 49.93% |
| Hypothyroidism                                    | 8.37%  | 10.17% | 7.60%  | 7.64%  | 8.40%  | 7.56%  |
| Liver disease                                     | 2.30%  | 2.39%  | 2.26%  | 2.17%  | 2.33%  | 2.15%  |
| Lymphoma                                          | 0.97%  | 0.88%  | 1.01%  | 1.03%  | 1.04%  | 1.03%  |
| Obesity                                           | 7.88%  | 7.19%  | 8.18%  | 7.92%  | 8.12%  | 7.90%  |
| Other neurological disorders                      | 4.26%  | 4.64%  | 4.10%  | 4.11%  | 4.88%  | 4.02%  |
| Peptic ulcer disease excl. bleeding               | 1.54%  | 1.63%  | 1.50%  | 1.46%  | 1.63%  | 1.44%  |
| Psychoses                                         | 0.42%  | 0.76%  | 0.27%  | 0.24%  | 0.32%  | 0.23%  |
| Pulmonary circulation disorders                   | 1.85%  | 2.20%  | 1.71%  | 1.69%  | 1.86%  | 1.67%  |
| Peripheral vascular disease                       | 4.96%  | 5.41%  | 4.76%  | 4.78%  | 5.74%  | 4.66%  |
| Renal failure                                     | 9.99%  | 12.51% | 8.91%  | 8.90%  | 11.31% | 8.62%  |
| Rheumatoid arthritis / collagen vascular diseases | 5.57%  | 6.30%  | 5.26%  | 5.38%  | 5.94%  | 5.31%  |
| Solid tumour without metastasis                   | 7.30%  | 6.62%  | 7.59%  | 7.78%  | 7.89%  | 7.77%  |
| Valvular disease                                  | 6.90%  | 8.05%  | 6.40%  | 6.46%  | 7.72%  | 6.32%  |
| Weight loss                                       | 2.54%  | 2.99%  | 2.34%  | 2.27%  | 2.96%  | 2.20%  |
| Congestive heart failure                          | 7.15%  | 8.99%  | 6.36%  | 6.24%  | 8.04%  | 6.04%  |
| Chronic pulmonary disease                         | 19.67% | 21.65% | 18.82% | 18.49% | 20.95% | 18.21% |
| Hemiplegia or paraplegia                          | 1.18%  | 1.34%  | 1.11%  | 1.05%  | 1.28%  | 1.03%  |
| Metastatic solid tumour / metastatic cancer       | 2.07%  | 1.89%  | 2.15%  | 2.17%  | 1.99%  | 2.19%  |
| Frailty syndromes (previous three years)          |        |        |        |        |        |        |
| Anxiety or depression                             | 8.51%  | 10.93% | 7.46%  | 7.36%  | 9.14%  | 7.16%  |
| Cognitive impairment                              | 7.14%  | 9.95%  | 5.93%  | 5.80%  | 8.52%  | 5.49%  |

|                                                                            |                |                |                |                |                |             |
|----------------------------------------------------------------------------|----------------|----------------|----------------|----------------|----------------|-------------|
| Functional dependence                                                      | 1.32%          | 2.27%          | 0.91%          | 0.89%          | 1.57%          | 0.81%       |
| Fall or significant fracture                                               | 11.80%         | 17.11%         | 9.52%          | 9.54%          | 12.65%         | 9.18%       |
| Incontinence                                                               | 1.78%          | 2.44%          | 1.50%          | 1.45%          | 2.00%          | 1.38%       |
| Mobility problems                                                          | 4.24%          | 6.31%          | 3.35%          | 3.25%          | 4.80%          | 3.07%       |
| Pressure ulcers                                                            | 1.36%          | 2.14%          | 1.03%          | 1.00%          | 1.47%          | 0.94%       |
| Other conditions predictive of emergency admissions (previous three years) |                |                |                |                |                |             |
| Miscellaneous cognitive dysfunction                                        | 6.35%          | 8.73%          | 5.33%          | 5.21%          | 6.97%          | 5.01%       |
| Cerebral vascular disease                                                  | 6.73%          | 8.33%          | 6.04%          | 5.97%          | 7.44%          | 5.80%       |
| Dementia                                                                   | 3.09%          | 3.96%          | 2.72%          | 2.63%          | 4.05%          | 2.47%       |
| Myocardial infarction                                                      | 9.19%          | 9.59%          | 9.02%          | 8.91%          | 10.89%         | 8.68%       |
| Any hospital usage (previous 12 months) <sup>b</sup>                       |                |                |                |                |                |             |
| A&E attendance <sup>b</sup>                                                | 34.50%         | 39.42%         | 32.38%         | 31.73%         | 36.68%         | 31.15%      |
| Emergency admission <sup>b</sup>                                           | 24.39%         | 29.48%         | 22.20%         | 21.81%         | 26.26%         | 21.29%      |
| Chronic ACS emergency admission <sup>b</sup>                               | 3.61%          | 4.48%          | 3.24%          | 3.14%          | 4.00%          | 3.04%       |
| Acute ACS emergency admission <sup>b</sup>                                 | 6.07%          | 7.62%          | 5.40%          | 5.22%          | 6.92%          | 5.03%       |
| Rates of hospital usage (previous 12 months), mean (SD)                    |                |                |                |                |                |             |
| A&E attendances                                                            | 0.61<br>(1.27) | 0.74<br>(1.50) | 0.56<br>(1.16) | 0.54<br>(1.14) | 0.67<br>(1.30) | 0.53 (1.11) |
| Emergency admissions                                                       | 0.38<br>(0.88) | 0.48<br>(1.01) | 0.34<br>(0.81) | 0.33<br>(0.80) | 0.42<br>(0.93) | 0.32 (0.79) |
| Chronic ACS emergency admissions                                           | 0.05<br>(0.28) | 0.06<br>(0.32) | 0.04<br>(0.26) | 0.04<br>(0.26) | 0.05<br>(0.29) | 0.04 (0.25) |
| Acute ACS emergency admissions                                             | 0.08<br>(0.36) | 0.10<br>(0.42) | 0.07<br>(0.33) | 0.06<br>(0.32) | 0.09<br>(0.38) | 0.06 (0.31) |

<sup>a</sup>Study population consisted of all people aged 65 years or older, registered at GP practices in England on 1 December 2018 and living in England, with a valid pseudonymized UPRN, not living in a care home, living in a household of 6 people or fewer, and with at least one hospital admission in the previous three years.

<sup>b</sup>Not adjusted for in the main analysis.
